# Supplementary material for: Genetic diversity and differentiation in reef-building Millepora species, as revealed by cross-species amplification of fifteen novel microsatellite loci
Source: PeerJ. 2017 Feb 23;5:e2936. doi: 10.7717/peerj.2936 (PMC5326544; doi:10.7717/peerj.2936)
Supplement: Data S1 — — indicates no amplification. [file peerj-05-2936-s006.xlsx]

## Sheet: Feuil1
Sample Name	Species	Mill7	Mill7	Mill27	Mill27	Mill30	Mill30	Mill47	Mill47	Mill52	Mill52	Mill56	Mill56	Mill61	Mill61	Mill67	Mill67	Mill86	Mill86	Mill91	Mill91	Mill93	Mill93	Mill94	Mill94	Mill95	Mill95	Mill101	Mill101	Mill103	Mill103
MDT1-L050	Millepora platyphylla	114	114	140	140	205	207	120	144	94	94	194	194	163	166	283	283	106	106	116	116	94	94	137	137	123	123	132	135	96	98
MDT1-L082	Millepora platyphylla	118	122	142	142	205	207	120	156	94	94	194	194	166	166	275	275	106	106	116	116	94	94	134	137	123	129	132	132	96	98
MDT1-L094	Millepora platyphylla	96	116	140	142	205	205	158	158	94	94	194	194	163	163	275	275	106	106	116	116	94	94	134	134	123	123	132	135	96	98
MDT1-L096	Millepora platyphylla	118	118	142	144	203	205	120	120	94	94	194	194	163	166	283	283	106	106	116	116	94	100	134	137	123	129	132	135	96	98
MDT1-L100	Millepora platyphylla	112	214	140	140	203	205	156	156	94	94	194	194	163	166	283	283	106	106	116	116	94	94	134	137	123	123	132	135	96	96
MDT1-L109	Millepora platyphylla	118	126	140	144	203	207	154	156	94	94	194	194	163	163	327	355	106	106	116	116	91	94	137	137	123	129	132	135	96	96
MDT1-L112	Millepora platyphylla	114	118	140	142	207	207	156	156	94	94	194	194	163	166	275	283	106	106	116	116	94	94	134	137	123	123	135	135	96	98
MDT1-L122	Millepora platyphylla	114	126	144	144	203	205	120	120	94	96	194	194	163	166	275	275	106	106	116	116	94	100	134	137	123	129	132	135	96	98
MDT1-L130	Millepora platyphylla	96	122	142	144	205	205	120	150	96	96	194	194	163	166	275	275	106	106	116	116	94	94	134	137	123	123	132	135	96	98
MDT1-L143	Millepora platyphylla	122	128	140	144	205	211	118	144	94	96	194	194	163	163	283	307	106	106	116	116	100	100	134	137	123	123	132	135	94	100
MDT1-L194	Millepora platyphylla	122	124	138	140	203	205	120	150	94	94	194	194	163	163	307	347	106	106	116	116	94	100	134	137	129	129	132	135	96	98
MDT1-L222	Millepora platyphylla	118	130	144	144	205	207	152	156	94	94	194	194	163	163	271	271	106	106	116	116	94	94	134	134	123	123	132	135	96	100
MDT1-L230	Millepora platyphylla	114	114	140	144	205	207	120	158	94	96	194	194	163	163	275	307	106	106	116	116	94	94	134	137	123	123	135	135	96	96
MDT1-L284	Millepora platyphylla	114	122	140	144	203	205	156	156	94	96	194	194	166	166	275	283	106	106	116	116	94	94	134	134	123	123	132	135	94	100
MDT1-L291	Millepora platyphylla	114	114	140	144	203	205	156	158	94	94	194	194	166	166	275	275	106	106	116	116	94	94	134	137	123	123	132	132	94	94
MDT1-R009	Millepora platyphylla	114	126	140	142	205	207	154	156	94	94	194	194	163	166	275	307	106	106	116	116	94	94	134	134	123	129	132	132	96	98
MDT1-R017	Millepora platyphylla	118	124	140	140	205	207	120	120	94	96	194	194	163	166	275	275	106	106	116	116	94	94	134	134	123	123	132	135	96	96
MDT1-R058	Millepora platyphylla	120	122	142	142	205	205	144	144	94	96	194	194	163	166	275	275	106	106	116	116	100	100	134	137	123	123	135	135	96	98
MDT1-R086	Millepora platyphylla	114	114	140	142	207	207	120	160	94	96	194	194	166	166	275	307	106	106	116	116	94	94	134	137	123	123	132	135	96	98
MDT1-R123	Millepora platyphylla	114	118	140	140	203	205	120	158	94	94	194	194	166	166	275	279	106	106	116	116	94	94	134	134	123	129	132	135	96	96
MDT1-R157	Millepora platyphylla	96	96	140	142	203	207	156	156	94	96	194	194	163	166	275	275	106	106	116	116	94	94	134	137	123	123	132	135	96	98
MDT1-R184	Millepora platyphylla	118	126	142	142	205	205	152	152	94	96	194	194	163	166	283	331	106	106	116	116	94	94	134	134	123	129	135	135	96	98
MDT2-L007	Millepora platyphylla	118	124	138	140	203	207	146	156	94	94	194	194	163	166	275	275	106	106	116	116	94	94	134	134	123	129	135	135	96	96
MDT2-L026	Millepora platyphylla	118	118	140	142	205	205	120	156	94	96	194	194	166	166	271	271	106	106	116	116	94	94	134	134	123	129	132	135	96	98
MDT2-L059	Millepora platyphylla	114	122	140	140	203	207	156	158	94	96	194	194	166	166	275	275	106	106	116	116	94	94	134	134	123	129	132	135	96	96
MDT2-L079	Millepora platyphylla	118	122	138	144	205	205	154	154	94	94	194	194	166	166	275	275	106	106	116	116	91	94	134	137	123	135	132	135	96	98
MDT2-L084	Millepora platyphylla	114	128	140	140	207	211	144	156	94	96	194	194	163	163	275	275	106	106	116	116	100	100	137	137	123	129	132	135	96	100
MDT2-L089	Millepora platyphylla	114	118	140	140	205	205	120	120	94	94	194	194	163	166	275	307	106	106	116	116	100	100	134	137	123	123	132	135	96	98
MDT2-L114	Millepora platyphylla	116	126	142	142	205	205	120	156	94	94	194	194	163	163	275	275	106	106	116	116	94	94	134	134	123	123	132	135	96	98
MDT2-L117	Millepora platyphylla	110	128	140	140	205	207	120	120	94	96	194	194	166	166	275	275	106	106	116	116	94	94	137	137	123	123	132	132	94	94
MDT2-R020	Millepora platyphylla	96	130	144	144	205	205	154	156	94	96	194	194	163	163	275	307	106	106	116	116	94	94	134	137	123	123	135	135	96	96
MDT2-R028	Millepora platyphylla	112	218	142	144	203	207	156	156	96	96	194	194	166	166	275	275	106	106	116	116	94	94	134	137	123	123	132	135	96	100
MDT2-R057	Millepora platyphylla	114	114	140	144	205	205	156	156	96	96	194	194	163	163	283	307	106	106	116	116	94	94	134	134	123	123	132	135	96	98
MDT2-R078	Millepora platyphylla	96	122	140	140	203	207	154	156	94	94	194	194	166	166	275	275	106	106	116	116	94	94	134	137	123	123	135	135	96	98
MDT2-R084	Millepora platyphylla	96	122	140	142	205	207	158	158	94	94	194	194	163	166	275	275	106	106	116	116	94	94	134	137	123	123	132	135	96	96
MDT2-R089	Millepora platyphylla	116	116	140	148	203	207	120	156	94	96	194	194	163	166	275	275	106	106	116	116	94	94	134	134	123	135	135	135	94	100
MDT2-R103	Millepora platyphylla	96	126	140	140	207	207	156	158	96	96	194	194	166	166	275	335	106	106	116	116	94	94	134	134	123	123	135	135	96	98
MDT2-R110	Millepora platyphylla	96	114	140	140	205	207	144	156	94	96	194	194	163	166	283	307	106	106	116	116	94	94	137	137	123	123	135	135	96	98
MDT3-L044	Millepora platyphylla	114	128	142	144	205	211	156	156	94	94	194	194	163	163	275	331	106	106	116	116	94	94	134	137	123	123	132	135	96	98
MDT3-L073	Millepora platyphylla	112	214	140	142	205	205	154	156	94	94	194	194	166	166	275	275	106	106	116	116	94	100	137	137	123	129	135	135	96	98
MDT3-L106	Millepora platyphylla	118	118	140	140	207	211	120	156	94	94	194	194	163	166	275	275	106	106	116	116	94	100	134	137	123	135	132	135	96	98
MDT3-L115	Millepora platyphylla	116	116	140	140	203	205	120	160	94	94	194	194	163	166	275	311	106	106	116	116	94	94	134	137	123	123	132	135	96	98
MDT3-L147	Millepora platyphylla	106	112	140	144	203	207	118	118	94	96	194	194	163	166	275	307	106	106	116	116	94	94	134	134	123	123	132	135	96	96
MDT3-L152	Millepora platyphylla	118	126	140	142	205	207	120	156	94	96	194	194	166	166	275	283	106	106	116	116	94	100	134	134	123	123	132	135	94	94
MDT3-L162	Millepora platyphylla	96	114	140	144	207	211	156	156	94	94	194	194	163	166	275	275	106	106	116	116	94	100	134	137	123	123	132	135	96	98
MDT3-R7	Millepora platyphylla	114	120	140	142	203	205	154	158	94	94	194	194	163	166	283	283	106	106	116	116	94	100	134	134	123	123	132	135	96	96
MDT3-R12	Millepora platyphylla	106	126	140	144	203	205	156	156	94	94	194	194	166	166	275	275	106	106	116	116	94	100	134	137	123	123	132	135	94	100
MDT3-R69	Millepora platyphylla	114	126	140	142	205	205	156	160	94	96	194	194	163	166	275	275	106	106	116	116	94	100	134	134	123	123	135	135	94	94
MDT3-R78	Millepora platyphylla	114	114	140	142	203	205	120	156	94	96	194	194	163	166	275	307	106	106	116	116	94	94	134	134	123	123	132	132	96	98
MDT3-R106	Millepora platyphylla	116	128	140	142	205	205	118	156	94	96	194	194	163	166	275	283	106	106	116	116	94	100	134	134	123	129	132	132	96	98
PNG-001	Millepora intricata	---	---	172	182	---	---	118	120	94	94	194	194	---	---	---	---	---	---	116	116	103	103	128	128	123	126	135	135	96	96
PNG-003	Millepora intricata	---	---	158	160	---	---	118	118	94	94	194	197	---	---	---	---	---	---	116	116	91	103	128	128	123	126	135	135	94	98
UFL031	Millepora intricata	---	---	172	188	---	---	116	120	94	94	194	194	---	---	261	261	---	---	116	116	103	103	122	128	126	126	135	135	94	94
UFL032	Millepora intricata	---	---	172	188	---	---	116	120	94	94	194	194	---	---	261	261	---	---	116	116	103	103	122	128	126	126	135	135	94	94
UFL035	Millepora intricata	---	---	156	170	---	---	116	122	---	---	194	197	---	---	---	---	---	---	116	116	97	97	128	128	123	126	135	135	94	98
UFL037	Millepora intricata	---	---	162	162	---	---	120	122	94	94	194	194	---	---	249	249	---	---	116	116	94	97	128	128	123	123	135	135	94	96
UFL039	Millepora intricata	---	---	156	173	---	---	116	120	94	94	194	194	---	---	---	---	---	---	116	116	94	97	128	140	126	126	135	135	94	96
UFL040	Millepora intricata	---	---	186	196	---	---	120	122	94	94	194	194	---	---	261	265	---	---	116	116	97	97	128	140	126	126	135	135	94	96
UFL042	Millepora intricata	---	---	172	176	---	---	116	122	94	94	194	194	---	---	---	---	---	---	116	116	97	97	128	128	123	126	132	138	94	96
EXT068	Millepora intricata	---	---	174	184	---	---	116	116	94	94	194	194	---	---	261	261	---	---	116	116	91	97	128	131	126	126	135	135	96	104
EXT087	Millepora intricata	---	---	176	181	---	---	116	116	94	94	194	194	---	---	---	---	---	---	116	116	91	97	128	131	123	126	135	135	94	96
EUR13-006	Millepora dichotoma	---	---	160	180	---	---	128	128	94	94	194	194	---	---	255	255	97	97	116	116	94	100	128	140	126	126	135	135	96	96
EUR13-007	Millepora dichotoma	---	---	160	164	---	---	118	118	94	94	194	197	---	---	---	---	97	97	116	116	97	97	140	140	123	126	135	135	94	94
EUR13-008	Millepora dichotoma	---	---	176	182	---	---	120	120	94	94	194	194	---	---	---	---	97	97	116	116	97	100	128	131	120	126	135	135	96	96
EUR13-009	Millepora dichotoma	---	---	160	180	---	---	128	128	94	94	194	194	---	---	255	255	97	97	116	116	94	100	128	140	126	126	135	135	96	96
EUR13-010	Millepora dichotoma	---	---	176	182	---	---	120	120	94	94	194	194	---	---	---	---	97	97	116	116	97	100	128	131	120	126	135	135	96	96
EUR13-011	Millepora dichotoma	98	98	174	184	---	---	122	122	94	94	194	197	---	---	255	255	97	97	116	116	97	97	128	131	123	126	135	135	94	94
EUR13-012	Millepora dichotoma	---	---	176	182	---	---	120	120	94	94	194	194	---	---	---	---	97	97	116	116	97	100	128	131	120	126	135	135	96	96
EUR13-013	Millepora dichotoma	---	---	176	182	---	---	120	120	94	94	194	194	---	---	---	---	97	97	116	116	97	100	128	131	120	126	135	135	96	96
EUR13-014	Millepora dichotoma	100	100	160	164	---	---	118	118	94	94	194	197	---	---	---	---	97	97	116	116	97	97	140	140	123	126	135	135	94	94
EUR13-015	Millepora dichotoma	---	---	180	182	---	---	120	120	94	94	194	194	---	---	---	---	97	97	116	116	97	100	128	131	120	126	135	135	94	96
EUR13-016	Millepora dichotoma	---	---	176	186	---	---	120	120	94	94	194	194	---	---	---	---	97	97	116	116	97	100	128	131	120	126	135	135	94	96
EUR13-017	Millepora dichotoma	---	---	176	182	---	---	120	120	94	94	194	194	---	---	---	---	97	97	116	116	97	100	128	131	120	126	135	135	94	96
EUR13-018	Millepora dichotoma	98	98	174	188	---	---	122	122	94	94	194	197	---	---	255	255	97	97	116	116	97	97	128	131	123	126	135	135	94	94
EUR13-019	Millepora dichotoma	102	102	178	186	---	---	---	---	94	94	194	194	---	---	261	261	97	97	116	116	94	97	128	137	123	123	135	135	94	94
EUR13-020	Millepora dichotoma	---	---	170	184	---	---	116	118	94	94	194	200	---	---	255	255	97	97	116	116	97	97	128	131	120	123	135	135	94	96
EUR13-021	Millepora dichotoma	---	---	160	182	---	---	118	118	94	94	194	197	---	---	---	---	97	97	116	116	97	97	140	140	126	126	135	135	94	94
EUR13-022	Millepora dichotoma	96	96	154	184	---	---	120	120	94	94	194	194	---	---	---	---	97	97	116	116	97	97	128	131	120	126	135	135	94	96
EUR13-023	Millepora dichotoma	---	---	152	184	---	---	---	---	94	94	194	194	---	---	---	---	97	97	116	116	97	97	128	128	123	123	135	135	96	96
EUR13-024	Millepora dichotoma	---	---	152	184	---	---	---	---	94	94	194	194	---	---	---	---	97	97	116	116	97	97	128	128	123	123	135	135	94	96
EUR13-025	Millepora dichotoma	---	---	170	184	---	---	116	118	94	94	194	200	---	---	255	255	97	97	116	116	97	97	128	131	120	123	135	135	94	96
EUR13-026	Millepora dichotoma	96	96	170	184	---	---	116	118	94	94	194	200	---	---	255	255	97	97	116	116	97	97	128	131	120	123	135	135	94	96
EUR13-027	Millepora dichotoma	---	---	154	184	---	---	120	120	94	94	194	194	---	---	---	---	97	97	116	116	97	97	128	131	120	126	135	135	94	96
EUR13-028	Millepora dichotoma	96	96	160	186	---	---	---	---	94	94	194	194	---	---	---	---	97	97	116	116	100	100	128	128	123	126	135	135	94	96
EUR13-029	Millepora dichotoma	---	---	154	184	---	---	120	120	94	94	194	194	---	---	---	---	97	97	116	116	97	97	128	131	120	126	135	135	94	96
EUR13-030	Millepora dichotoma	---	---	168	182	---	---	116	120	94	94	194	197	---	---	255	255	97	97	116	116	94	97	128	140	123	123	135	135	96	96
EUR13-031	Millepora dichotoma	98	98	174	182	---	---	122	122	94	94	194	197	---	---	255	255	97	97	116	116	97	97	128	131	123	126	135	135	94	94
EUR13-032	Millepora dichotoma	---	---	170	190	---	---	128	128	94	94	194	200	---	---	255	255	97	97	116	116	94	97	128	140	126	126	135	135	94	96
EUR13-033	Millepora dichotoma	---	---	170	188	---	---	128	128	94	94	194	200	---	---	255	255	97	97	116	116	94	97	128	140	126	126	135	135	94	96
EUR13-034	Millepora dichotoma	---	---	150	180	---	---	116	116	94	94	194	194	---	---	255	255	97	97	116	116	94	100	128	140	123	126	135	135	94	96
EUR13-035	Millepora dichotoma	---	---	150	182	---	---	116	116	94	94	194	194	---	---	255	255	97	97	116	116	94	100	128	140	123	126	135	135	94	96
RUN09R006	Millepora tenera	---	---	138	174	209	209	116	116	94	94	194	194	---	---	---	---	---	---	116	116	---	---	128	131	123	123	138	138	94	94
RUN09R008	Millepora tenera	---	---	184	198	---	---	114	116	94	94	194	194	---	---	241	241	---	---	116	116	97	97	128	128	123	123	135	135	96	96
RUN09R009	Millepora tenera	---	---	184	198	---	---	114	116	96	96	194	194	---	---	241	241	---	---	116	116	97	97	128	128	123	123	135	135	96	96
RUN09R010	Millepora tenera	---	---	184	198	---	---	114	116	94	94	194	194	---	---	241	241	---	---	116	116	97	97	128	128	123	123	135	135	96	96
RUN09R011	Millepora tenera	---	---	182	194	203	203	114	118	96	96	194	194	---	---	249	261	---	---	116	116	94	94	134	134	123	123	135	135	96	96
RUN09R016	Millepora tenera	---	---	170	194	209	209	116	116	94	94	194	197	---	---	241	241	---	---	116	116	94	94	128	128	126	126	135	135	94	94
RUN09R017	Millepora tenera	---	---	176	178	---	---	116	118	94	96	194	197	---	---	261	261	---	---	116	116	97	97	128	128	123	123	135	135	94	96
RUN09R018	Millepora tenera	---	---	170	196	209	213	116	116	94	94	194	197	---	---	241	241	---	---	116	116	94	94	128	128	126	126	132	135	94	94
RUN09R021	Millepora tenera	---	---	168	184	---	---	118	126	94	94	194	197	---	---	249	261	---	---	116	116	97	97	128	128	123	123	135	135	94	94
RUN09R022	Millepora tenera	---	---	168	184	---	---	118	126	94	96	194	197	---	---	249	261	---	---	116	116	97	97	128	128	123	123	135	135	94	94
RUN09R023	Millepora tenera	---	---	170	194	---	---	116	116	94	94	194	197	---	---	241	241	---	---	116	116	94	94	128	128	126	126	135	135	94	94
RUN09R024	Millepora tenera	---	---	168	182	---	---	118	126	94	94	194	197	---	---	249	261	---	---	116	116	97	97	128	128	123	123	135	135	94	94
RUN09R025	Millepora tenera	---	---	170	196	203	213	116	116	94	94	194	197	---	---	241	241	---	---	116	116	94	94	128	128	126	126	135	135	94	94
RUN09R026	Millepora tenera	---	---	168	184	---	---	118	126	94	94	194	197	---	---	249	261	---	---	116	116	97	97	128	128	123	123	135	135	94	94
RUN09R027	Millepora tenera	---	---	170	194	209	209	116	116	94	94	194	197	---	---	241	241	---	---	116	116	94	94	128	128	126	126	135	135	94	94
RUN09R028	Millepora tenera	---	---	170	196	---	---	116	116	94	94	194	197	---	---	241	241	---	---	116	116	94	94	128	128	126	126	135	135	94	94
RUN09R030	Millepora tenera	---	---	168	182	203	209	118	126	94	94	194	197	---	---	249	261	---	---	116	116	97	97	128	128	123	123	138	138	94	94
RUN09R033	Millepora tenera	---	---	170	194	---	---	116	116	94	94	194	197	---	---	241	241	---	---	116	116	94	94	128	128	126	126	135	135	94	94
RUN09R034	Millepora tenera	---	---	168	184	---	---	118	126	94	94	194	197	---	---	249	261	---	---	116	116	97	97	128	128	123	123	132	135	94	94
RUN09R036	Millepora tenera	---	---	168	184	209	209	118	126	94	94	194	197	---	---	249	261	---	---	116	116	97	97	128	128	123	123	135	135	94	94
RUN09R047	Millepora tenera	---	---	184	188	205	205	118	118	94	94	194	197	---	---	249	249	---	---	116	116	97	97	128	137	123	126	135	135	96	96
RUN09R049	Millepora tenera	---	---	184	188	205	205	118	118	94	94	194	197	---	---	249	249	---	---	116	116	97	97	128	137	123	126	135	135	96	96
RUN09R050	Millepora tenera	---	---	184	188	---	---	118	118	94	94	194	197	---	---	249	249	---	---	116	116	97	97	128	137	123	126	135	135	96	96
RUN09R051	Millepora tenera	---	---	184	188	---	---	118	118	94	94	194	197	---	---	249	249	---	---	116	116	97	97	128	137	123	126	135	135	96	96
RUN09R052	Millepora tenera	---	---	182	186	---	---	118	118	94	94	194	197	---	---	249	249	---	---	116	116	97	97	128	134	123	126	135	135	96	96
RUN09R053	Millepora tenera	---	---	182	186	207	207	118	118	94	94	194	197	---	---	249	249	---	---	116	116	97	97	128	134	123	126	135	135	96	96
RUN09R054	Millepora tenera	---	---	184	190	---	---	114	118	94	94	194	194	---	---	261	261	---	---	116	116	94	97	128	134	123	126	135	135	96	96
RUN09R055	Millepora tenera	---	---	170	190	209	209	114	116	94	94	194	197	---	---	256	256	---	---	116	116	94	97	137	137	123	126	132	138	---	---
RUN09R056	Millepora tenera	---	---	174	186	---	---	116	128	94	94	194	194	---	---	249	249	---	---	116	116	94	97	128	134	123	123	135	135	96	96
RUN09R057	Millepora tenera	---	---	154	178	---	---	116	116	94	94	194	194	---	---	249	249	---	---	116	116	94	97	128	137	123	126	135	135	96	96
CUR14-002	Millepora complanata	---	---	---	---	205	205	118	118	---	---	197	197	---	---	---	---	---	---	116	116	---	---	128	128	123	123	---	---	96	96
CUR14-003	Millepora complanata	---	---	---	---	207	207	118	118	---	---	197	197	---	---	---	---	---	---	152	152	---	---	128	131	135	135	---	---	96	96
CUR14-004	Millepora complanata	---	---	---	---	205	205	118	118	---	---	197	197	---	---	---	---	---	---	158	173	---	---	131	134	171	171	---	---	96	96
CUR14-005	Millepora complanata	---	---	---	---	207	207	118	118	---	---	197	197	---	---	---	---	---	---	158	158	---	---	---	---	129	171	---	---	96	96
CUR14-007	Millepora complanata	92	120	---	---	205	205	118	118	---	---	197	197	---	---	---	---	---	---	116	116	---	---	---	---	126	126	---	---	192	96
CUR14-008	Millepora complanata	92	92	---	---	205	207	118	118	---	---	197	197	---	---	---	---	---	---	---	---	---	---	128	134	120	123	---	---	94	98
CUR14-009	Millepora complanata	---	---	---	---	207	207	118	118	---	---	200	200	---	---	---	---	---	---	---	---	---	---	131	140	123	123	---	---	96	98
CUR14-010	Millepora complanata	---	---	---	---	207	207	118	118	---	---	197	200	---	---	---	---	---	---	116	116	---	---	140	140	123	123	---	---	96	96
CUR14-011	Millepora complanata	---	---	---	---	205	205	118	118	---	---	197	197	---	---	---	---	---	---	116	116	---	---	128	128	123	123	---	---	192	96
CUR14-012	Millepora complanata	112	132	---	---	---	---	118	118	---	---	197	197	---	---	---	---	---	---	116	116	---	---	128	140	123	171	---	---	94	98
CUR14-013	Millepora complanata	110	110	---	---	---	---	118	118	---	---	197	200	---	---	---	---	---	---	173	173	---	---	128	137	123	123	---	---	94	96
CUR14-014	Millepora complanata	---	---	---	---	205	205	118	118	---	---	200	200	---	---	---	---	---	---	---	---	---	---	128	128	123	123	---	---	96	96
CUR14-015	Millepora complanata	---	---	---	---	211	211	118	118	---	---	197	197	---	---	---	---	---	---	173	173	---	---	131	131	135	135	---	---	96	98
CUR14-019	Millepora complanata	---	---	---	---	211	211	118	118	---	---	200	200	---	---	---	---	---	---	194	194	---	---	---	---	123	123	---	---	96	96
CUR14-021	Millepora complanata	---	---	---	---	---	---	118	118	---	---	197	197	---	---	---	---	---	---	173	173	---	---	140	140	123	123	---	---	96	96
CUR14-022	Millepora complanata	108	114	---	---	---	---	118	118	---	---	197	197	---	---	---	---	---	---	116	116	---	---	131	131	---	---	---	---	---	---
CUR14-023	Millepora complanata	---	---	---	---	---	---	118	118	---	---	197	197	---	---	---	---	---	---	173	173	---	---	128	128	126	135	---	---	192	96
CUR14-025	Millepora complanata	---	---	---	---	---	---	118	118	---	---	169	200	---	---	---	---	---	---	101	101	---	---	128	128	123	135	---	---	94	94
CUR14-026	Millepora complanata	---	---	---	---	---	---	118	118	---	---	197	197	---	---	---	---	---	---	173	173	---	---	134	134	123	123	---	---	96	96
CUR14-027	Millepora complanata	---	---	---	---	---	---	118	118	---	---	197	197	---	---	---	---	---	---	101	173	---	---	128	128	123	132	---	---	94	96
CUR14-028	Millepora complanata	94	94	---	---	207	207	118	118	---	---	197	197	---	---	---	---	---	---	---	---	---	---	131	131	123	123	---	---	96	98
CUR14-029	Millepora complanata	94	106	---	---	---	---	118	118	---	---	197	200	---	---	---	---	---	---	116	116	---	---	---	---	123	129	---	---	96	96
CUR14-031	Millepora complanata	---	---	---	---	---	---	118	118	---	---	197	197	---	---	---	---	---	---	173	173	---	---	---	---	123	129	---	---	94	94
CUR14-032	Millepora complanata	---	---	---	---	205	205	118	118	---	---	197	200	---	---	---	---	---	---	173	173	---	---	128	131	123	123	---	---	94	94
CUR14-034	Millepora complanata	---	---	---	---	211	211	118	118	---	---	197	200	---	---	---	---	---	---	101	101	---	---	140	140	---	---	---	---	96	96
CUR14-036	Millepora complanata	94	94	---	---	---	---	118	118	---	---	197	197	---	---	---	---	---	---	119	119	---	---	131	131	123	123	---	---	94	98
CUR14-037	Millepora complanata	---	---	---	---	205	205	118	118	---	---	200	200	---	---	---	---	---	---	173	173	---	---	128	128	123	135	---	---	---	---
CUR14-039	Millepora complanata	---	---	---	---	205	121	118	118	---	---	197	197	---	---	---	---	---	---	116	116	---	---	196	196	123	123	---	---	98	205
CUR14-040	Millepora complanata	---	---	---	---	163	163	118	118	---	---	197	197	---	---	---	---	---	---	173	173	---	---	128	196	120	135	---	---	96	960
CUR14-041	Millepora complanata	112	112	---	---	163	163	118	118	---	---	197	197	---	---	---	---	---	---	---	---	---	---	128	194	123	123	---	---	94	940
RUN13-07	Millepora exaesa	---	---	---	---	203	209	---	---	96	96	194	194	---	---	---	---	---	---	---	---	---	---	131	131	---	---	---	---	---	---
RUN13-08	Millepora exaesa	---	---	---	---	207	209	---	---	96	98	194	194	---	---	---	---	---	---	---	---	---	---	128	138	---	---	---	---	---	---
RUN13-09	Millepora exaesa	---	---	---	---	205	207	---	---	96	96	194	194	---	---	---	---	---	---	---	---	---	---	128	128	---	---	---	---	---	---
RUN13-10	Millepora exaesa	---	---	---	---	207	207	---	---	96	98	194	194	---	---	---	---	---	---	---	---	---	---	134	134	---	---	---	---	---	---
RUN13-22	Millepora exaesa	---	---	---	---	205	207	---	---	96	96	194	194	---	---	---	---	---	---	---	---	---	---	131	131	---	---	---	---	---	---
EXT060	Millepora exaesa	---	---	---	---	205	207	---	---	94	94	194	194	---	---	---	---	---	---	---	---	94	97	134	134	126	141	132	135	96	96
EXT062	Millepora exaesa	---	---	---	---	209	209	---	---	94	94	194	194	---	---	---	---	---	---	---	---	---	---	134	134	132	132	135	135	96	96
BIO11-520	Millepora exaesa	---	---	---	---	---	---	116	116	94	126	194	194	---	---	---	---	---	---	---	---	94	97	---	---	111	129	135	135	96	96
BIO11-562	Millepora exaesa	---	---	---	---	---	---	120	120	94	94	194	194	---	---	---	---	---	---	---	---	94	97	---	---	111	129	135	135	96	98
BIO11-563	Millepora exaesa	---	---	---	---	---	---	116	120	94	94	194	194	---	---	---	---	---	---	---	---	94	97	---	---	111	129	135	135	96	96
BIO11-192	Millepora exaesa	---	---	---	---	---	---	116	118	94	96	194	194	---	---	---	---	---	---	---	---	97	94	---	---	111	123	132	135	96	96
BIO11-521	Millepora exaesa	---	---	---	---	---	---	120	120	94	126	194	194	---	---	---	---	---	---	---	---	94	97	---	---	111	135	135	135	94	96
BIO11-256	Millepora exaesa	---	---	---	---	205	205	116	118	94	94	194	194	---	---	---	---	---	---	---	---	97	94	---	---	111	129	138	144	94	94
BIO11-457	Millepora exaesa	---	---	---	---	205	205	116	116	94	96	194	194	---	---	---	---	---	---	---	---	91	94	---	---	123	126	135	138	96	96
