# Supplementary material for: Genetic diversity and differentiation in reef-building Millepora species, as revealed by cross-species amplification of fifteen novel microsatellite loci
Source: PubMed Central journal article supplement (PMC5326544; doi:10.7717/peerj.2936), 2017-02-23

# Species

-  *Millepora dichotoma*
-  *Millepora tenera*
-  *Millepora intricata*
-  *Millepora platyphylla*
-  *Millepora complanata*
-  *Millepora exaesa*

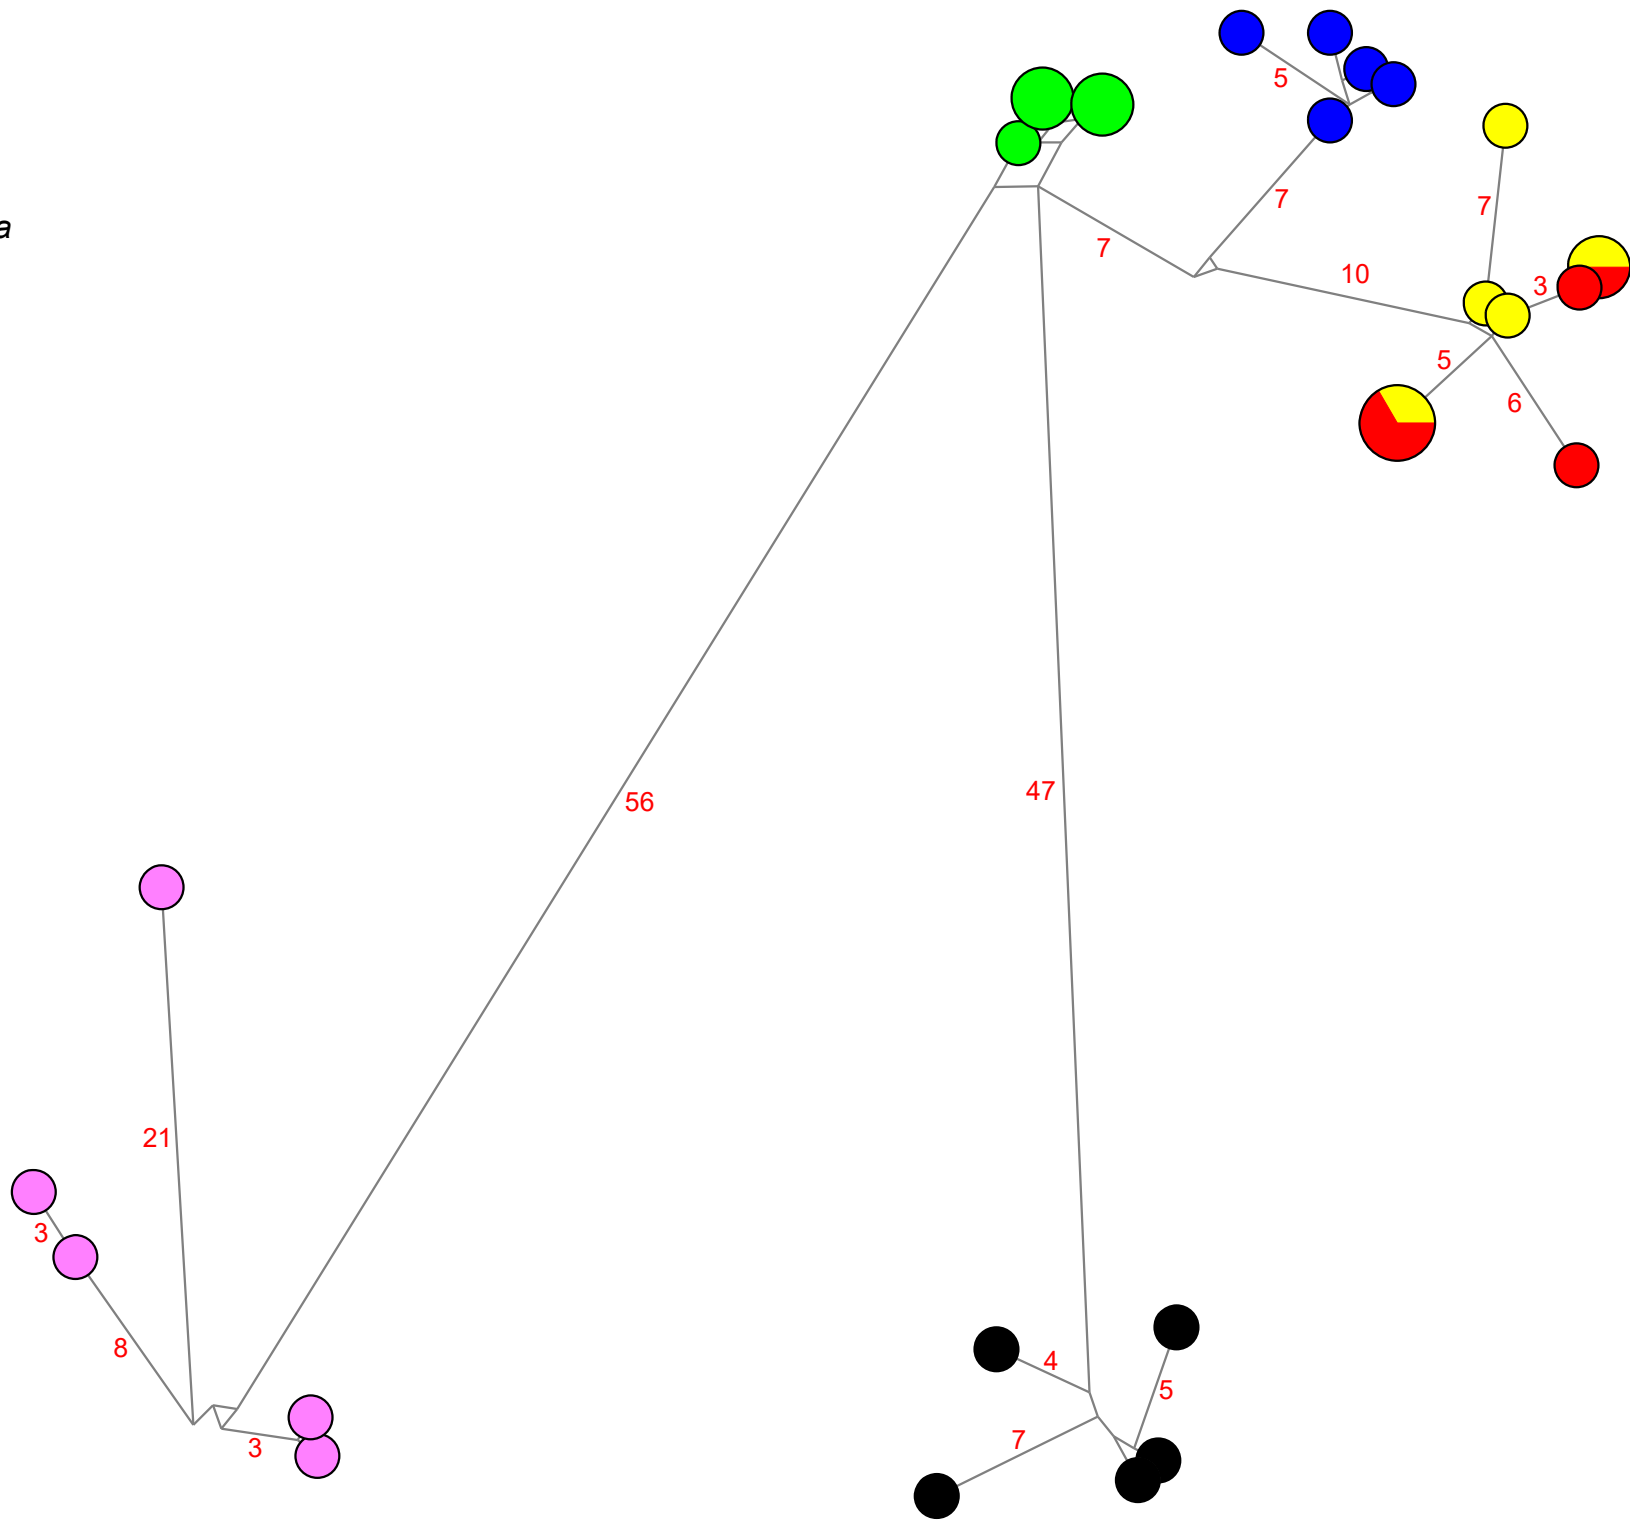

Supplement: peerj-05-2936-s004.pdf [file peerj-05-2936-s004.pdf]
