# Supplementary material for: Genetic diversity and differentiation in reef-building Millepora species, as revealed by cross-species amplification of fifteen novel microsatellite loci
Source: PubMed Central journal article supplement (PMC5326544; doi:10.7717/peerj.2936), 2017-02-23

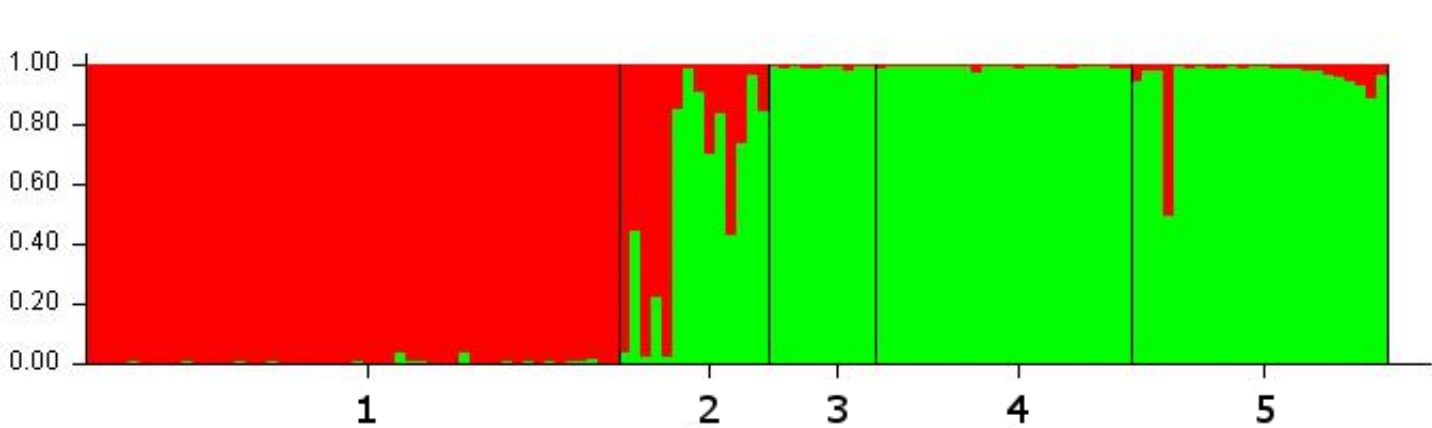

Supplement: peerj-05-2936-s005.pdf [file peerj-05-2936-s005.pdf]
